# Supplementary material for: Polyquinoneimines for lithium storage: more than the sum of its parts
Source: Royal Society of Chemistry journal article supplement (doi:10.1039/c6mh00072j), 2016-01-01
Supplement: c6mh00072j1.pdf [file c6mh00072j1.pdf]

## **Supplementary Information**

### **Polyquinoneimines for Lithium Storage: More than Sum of Its Parts**

Bingbing Tian,<sup>a,b</sup> Guo-Hong Ning,<sup>b</sup> Wei Tang,<sup>b</sup> Chengxin Peng,<sup>b</sup> Dingyi Yu,<sup>b</sup> Zhongxin Chen,<sup>b</sup> Yinglin Xiao,<sup>a</sup> Chenliang Su<sup>a,b</sup> and Kian Ping Loh<sup>a,b</sup>

<sup>a</sup> SZU-NUS Collaborative Innovation Center for Optoelectronic Science & Technology, Key Laboratory of Optoelectronic Devices and Systems of Ministry of Education and Guangdong Province, College of Optoelectronic Engineering, Shenzhen University, Shenzhen 518060, China

<sup>b</sup> Department of Chemistry, Centre for Advanced 2D Materials (CA2DM) and Graphene Research Centre, National University of Singapore, 3 Science Drive 3, Singapore, Singapore 117543, Singapore

K. P. Loh    E-mail: [chmlhkp@nus.edu.sg](mailto:chmlhkp@nus.edu.sg)    Fax: (+65) 67791691

## Synthesis of Polyquinoneimines (PQIs)

All the starting materials, 2,6-diaminoanthraquinone (DAAP), 1,4,5,8-naphthalenetetracarboxylic dianhydride (NTCDA), Perylene-3,4,9,10-tetracarboxylic dianhydride (PTCDA) and pyromellitic dianhydride (PMDA) were purchased from Sigma-Aldrich. The PQIs were synthesized *via* a DMF (*N,N*-Dimethylformamide, anhydrous, 99.8%, Sigma-Aldrich) solution process.<sup>1-2</sup> Specifically in a typical PQI-1 composite procedure, NTCDA (268 mg, 1 mmol) was added into DMF solution (40 mL). Then the as prepared mixture was heated to 140 °C until all the NTCDA dissolved in the solution. After DAAP (238 mg, 1 mmol) was added to the solution, the reaction mixture was refluxed and stirred under N<sub>2</sub> gas at 140 °C, then product precipitated gradually. After 3 days, the as-obtained powder was filtrated and washed with methanol and acetone. After dried at 60 °C overnight, the brown powder of PQI-1 is obtained. The PQI-3 synthetic method is similar to PQI-1 whereas a claret-red powder obtained. We also prepared PQI-2 *via* the similar synthetic procedure using the low solubility PTCDA. In order to get a more fully reacted product, much longer reaction time (7 days) was implemented in this experiment. Finally, a gray-black PQI-2 powder obtained according to the above processing steps.

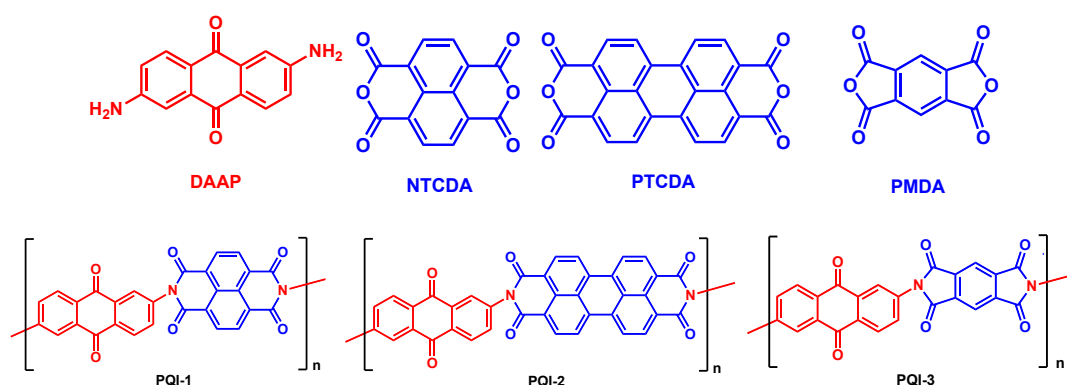

**Scheme S1. Molecular structure of DAAP, NTCDA, PTCDA, PMDA, PQI-1, PQI-2 and PQI-3.**

**Table S1** Theoretical gravimetric capacity of DAAP, NTCDA, PTCDA, PMDA, PQI-1, PQI-2 and PQI-3. (The theoretical gravimetric capacity of DAAP and dianhydrides are calculated based on a two electrons reaction in one monomer, the theoretical gravimetric capacity of PQIs are calculated based on a four electrons reaction in one monomer).

| Sample    | Theoretical gravimetric capacity (mAh g <sup>-1</sup> ) |
|-----------|---------------------------------------------------------|
| DAAP      | 225                                                     |
| NTCD<br>A | 200                                                     |
| PTCDA     | 137                                                     |
| PMDA      | 246                                                     |
| PQI-1     | 228                                                     |
| PQI-2     | 180                                                     |
| PQI-3     | 272                                                     |

#### **FTIR characterizations of PQIs and precursors:**

The FTIR spectroscopy of PQI and their precursors are performed to confirm the successfully polymerization of PQIs. As shown in Fig. S1, the peaks around 1136 and 940 cm<sup>-1</sup> in the precursors (NTCDA, PTCDA and PMDA) are attributed to the stretch of the C-O-C band, which almost disappeared in PQIs after polymerization. All the PQIs have a new peak at the 1360 cm<sup>-1</sup> band compare with dianhydrides, which is ascribed to the C-N stretch, indicating that the polymerization is successful. Moreover, the absorbance signals at 3332 and 3423 cm<sup>-1</sup>, attributed to the vibrational modes of the NH<sub>2</sub> bonds (primary amine) connected with benzene ring disappeared, also indicating the polycondensation reactions of dianhydrides with diamines. Furthermore, the characteristic band of C=O shifts to from 1772 cm<sup>-1</sup> to 1687 cm<sup>-1</sup>. This phenomenon derives from conjugation, which leads to a shift in the band towards

lower wave number. The strong absorption at  $1687\text{ cm}^{-1}$  also suggests that the carbonyl groups are well retained.<sup>3-4</sup>

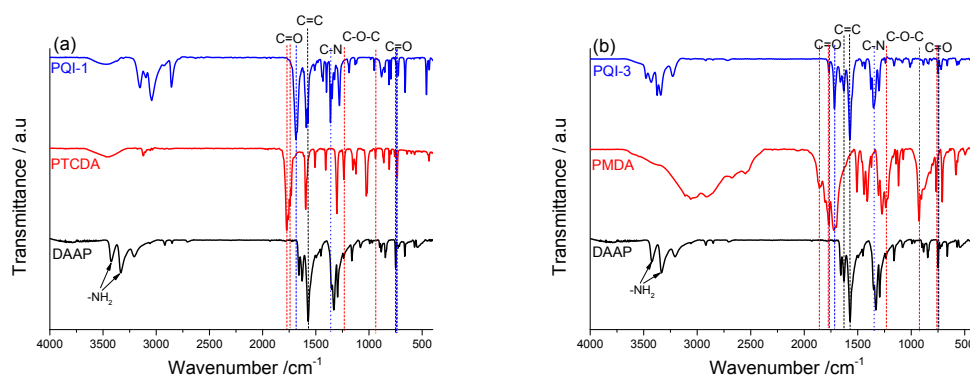

**Fig. S1.** FTIR curves of PQI-2 and PQI-3 with their precursors.

**Table S2** Characteristic FTIR band assignments of DAAP, NTCDA, PTCDA, PMDA, PQI-1, PQI-2 and PQI-3.

| Group           | DAAP | NTCDA | PTCDA | PMDA | PQI-1 | PQI-2             | PQI-3 |
|-----------------|------|-------|-------|------|-------|-------------------|-------|
| C=O, $\nu_{as}$ | 1659 | 1764  | 1774  | 1857 | 1713  | 1686 <sup>a</sup> | 1770  |
| C=O, $\nu_s$    | 1627 | 1728  | 1743  | 1771 | 1672  |                   | 1718  |
| C-N, $\nu$      | 1331 | —     | —     | —    | 1346  | 1361              | 1352  |
| C=C, $\nu$      | 1572 | 1728  | 1595  | 1722 | 1593  | 1589              | 1571  |

a, broaden and overlapping.

## TGA

TG analysis shows that the decomposition temperature of PQI-2 is  $\sim 500\text{ }^{\circ}\text{C}$  in  $\text{N}_2$  atmosphere, which is higher than PQI-1 and 3. This suggests that the PTCDA and DAAP polymerized and the PQI-2 has a best thermal stability compared with its analogues and precursors. However, PQI-3 shows an even poor thermal stability than its DAAP precursors, indicating a poor polymerization process or unstable polymerization products of PQI-3. This poor thermal stability of PQI-3 is responsible for the inferior cycling performance.

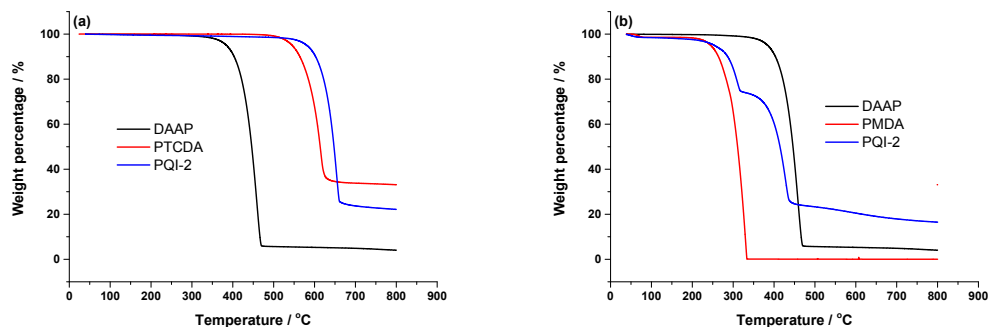

**Fig. S2.** TGA of PQI-2 and PQI-3 with their precursors.

### Scanning Electron Microscope (SEM) images of PQIs:

The morphologies of the synthesized PQIs are shown in Fig. S3. PQI-1 and PQI-3 form a regular lamellar structure, but PQI-2 forms irregular rod sheet due to the low solubility of its precursor PTCDA.

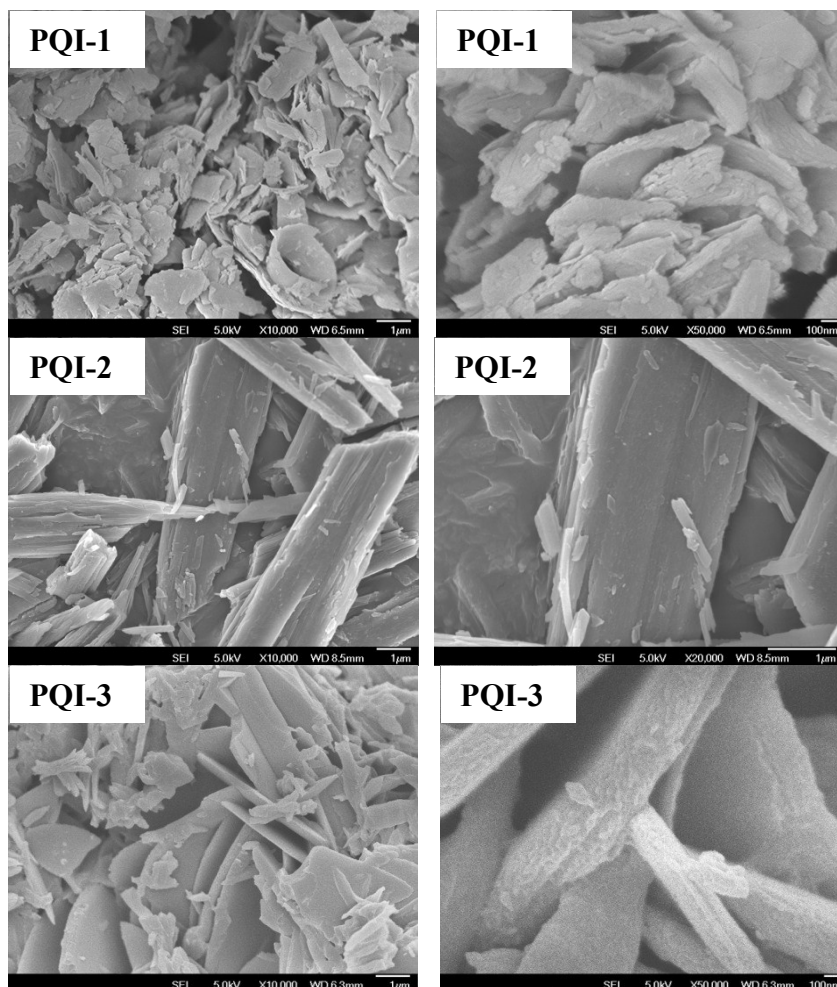

**Fig. S3.** SEM images of PQI-1, PQI-2 and PQI-3 materials.

### Transmission Electron Microscope (TEM) images of PQIs:

The TEM images of the PQIs are shown in Fig. S4. The PQI-1 material possesses a nanosheets structure.

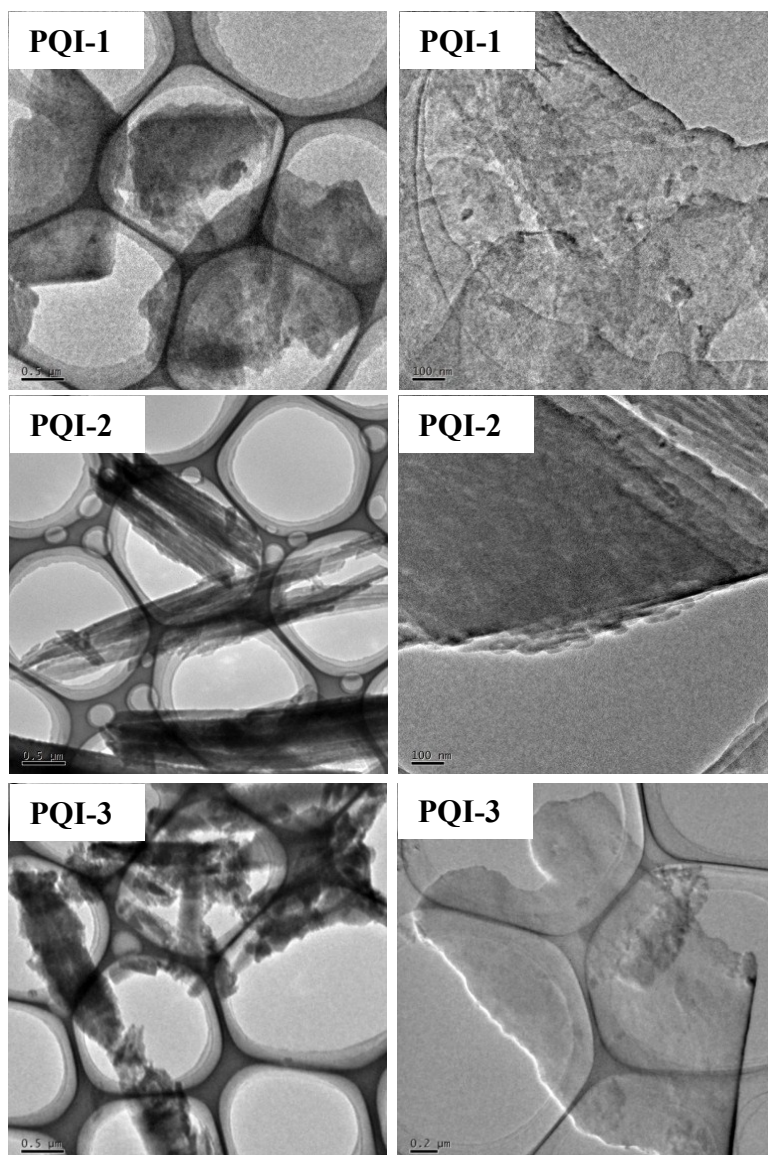

**Fig. S4.** TEM images of the PQI-1, PQI-2 and PQI-3 materials.

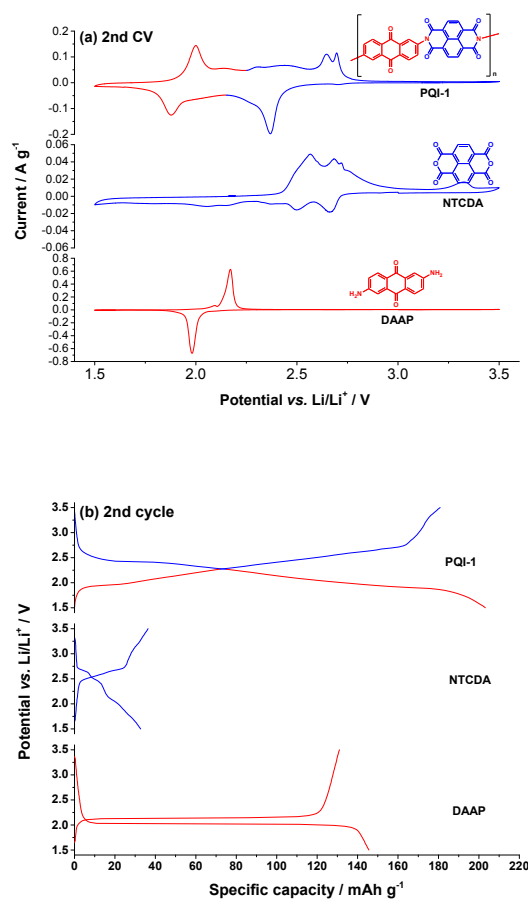

**Fig. S5.** (a) The second CV curves (scan rate: 0.1 mV s<sup>-1</sup>) and (b) the second discharge-charge curves of the DAAP, NTCDA and PQI-1 in the 1.5-3.5 V potential range.

From the electrode photographs of DAAP, NTCDA and PQI-1 after 5 discharge-charge cycles, we can clearly see the solubility of different organic electrode materials in electrolyte. The DAAP and NTCDA have an obviously serious dissolution in the electrolyte of 1 M LiTFSI in 1:1 v/v DOL:DME.

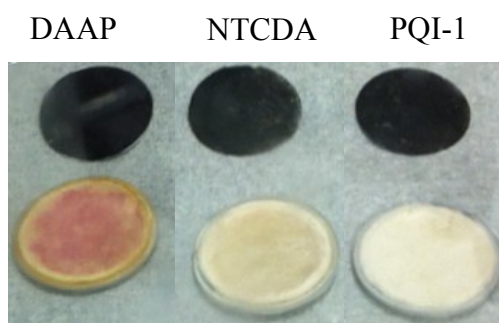

**Fig. S6.** Electrode photographs of DAAP, NTCDA and PQI-1 after 5 discharge-charge cycles.

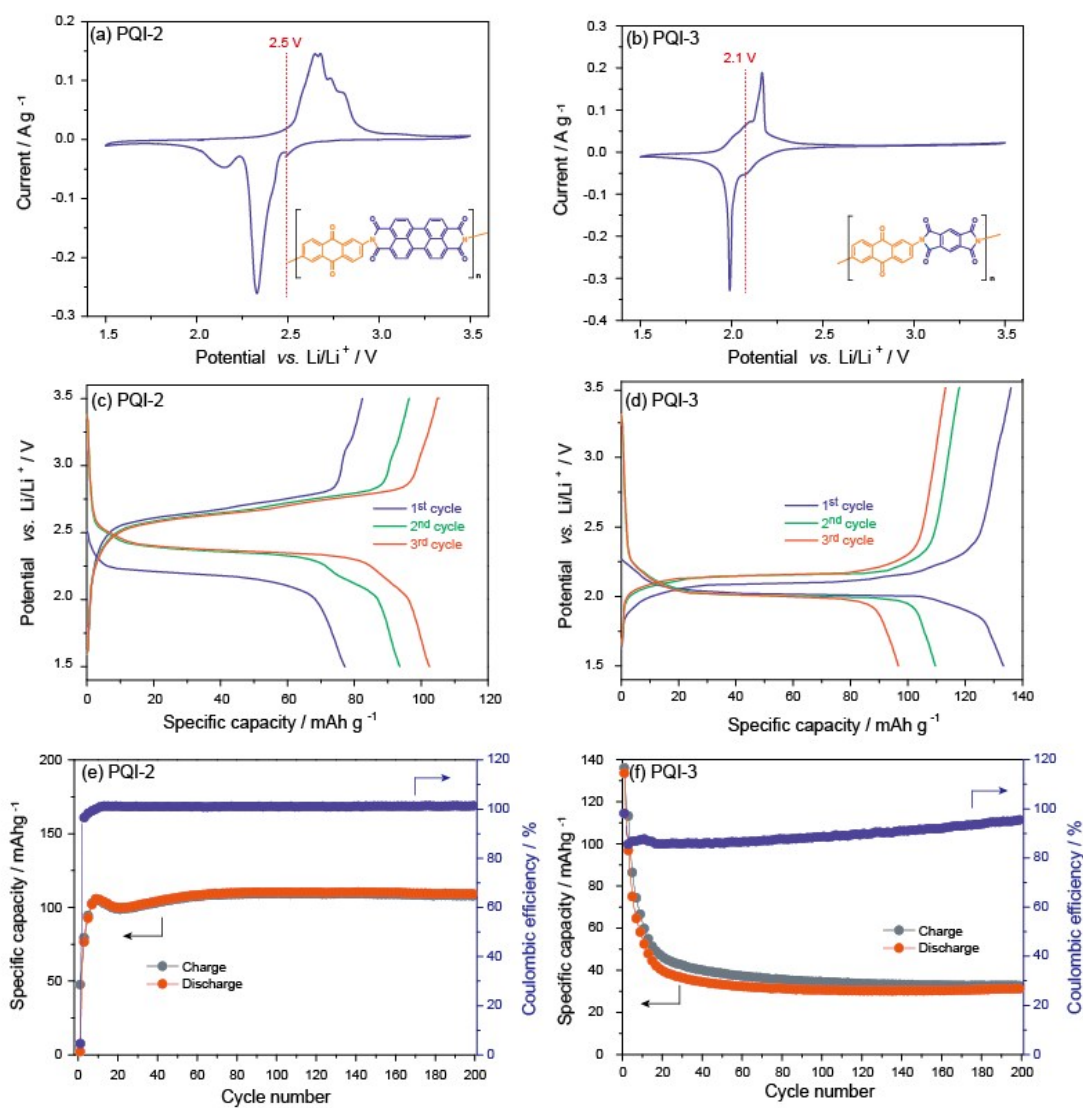

**Fig. S7.** (a), (b) the CV curves (scan rate: 0.1 mV s<sup>-1</sup>); (c), (d) the first three discharge-charge curves; and (e), (f) cycling performance of the PQI-2 and PQI-3 in the potential range of 1.5-3.5 V.

## References

---

- 1 B. Häupler, A. Wild, U. S. Schubert, *Adv. Energy Mater.* 2015, **5**, 1402034.
- 2 Z. Song, T. Xu, M. L. Gordin, Y.-B. Jiang, I.-T. Bae, IQ. Xiao, H. Zhan, J. Liu, d. Wang, *Nano Lett.* 2012, **12**, 2205.
- 3 H. Wu, K. Wang, Y. Meng, K. Lua, Z. Wei, *J. Mater. Chem. A* 2013, **1**, 6366.
- 4 J. Wu, X. Rui, C. Wang, W.-B. Pei, R. Lau, Q. Yan, Q. Zhang, *Adv. Energy Mater.* 2015, **5**, 1402189.
